# Supplementary material
Source: Springer Nature journal article supplement (https://www.springermedizin.de/resource/supplementary/12874_2011_625_MOESM1_ESM.pdf/9432280)

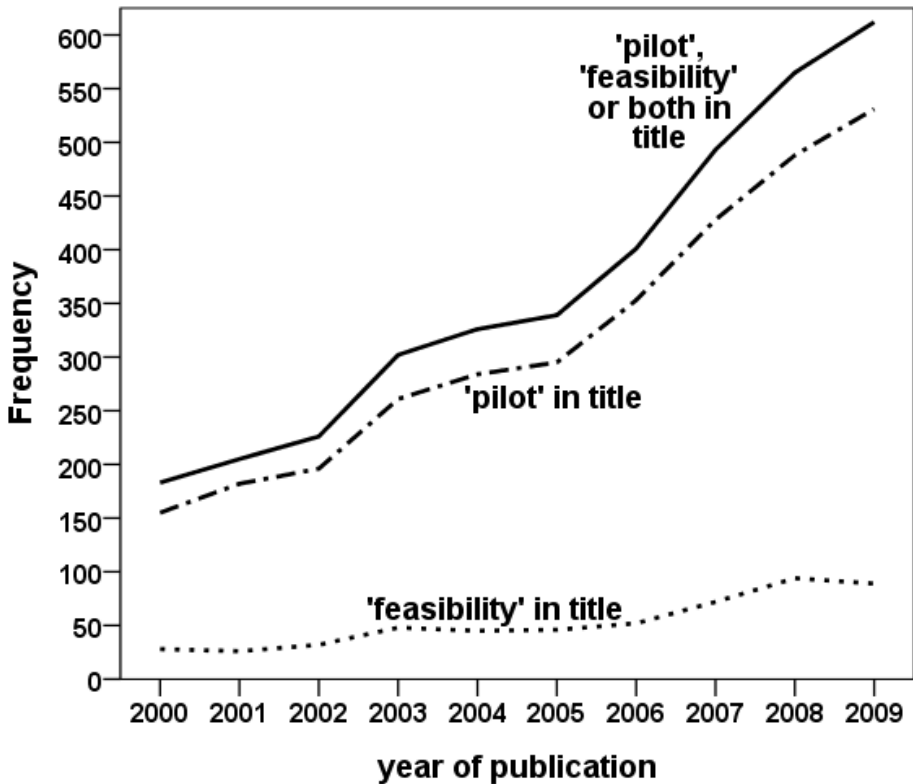

Supplement: MOESM1 [file 9432280]
